# Supplementary material for: Variation of carbon coatings on the electrochemical performance of LiFePO4 cathodes for lithium ionic batteries
Source: Royal Society of Chemistry journal article supplement (doi:10.1039/c7ra08062j), 2017-01-01
Supplement: c7ra08062j1.pdf [file c7ra08062j1.pdf]

## Supplementary material

Fig. S1 shows SEM images of LFP/SCC after 100 cycles (Fig.S1a,b) and LFP/HCC after 51 cycles at 0.2C. As can be seen from the diagram, the structure of the core shell does not change after cycling, and it is still a nanosphere structure. It is proved that the soft carbon coated with LFP after carbonation is more uniform and can improve the performance of lithium ion batteries again.

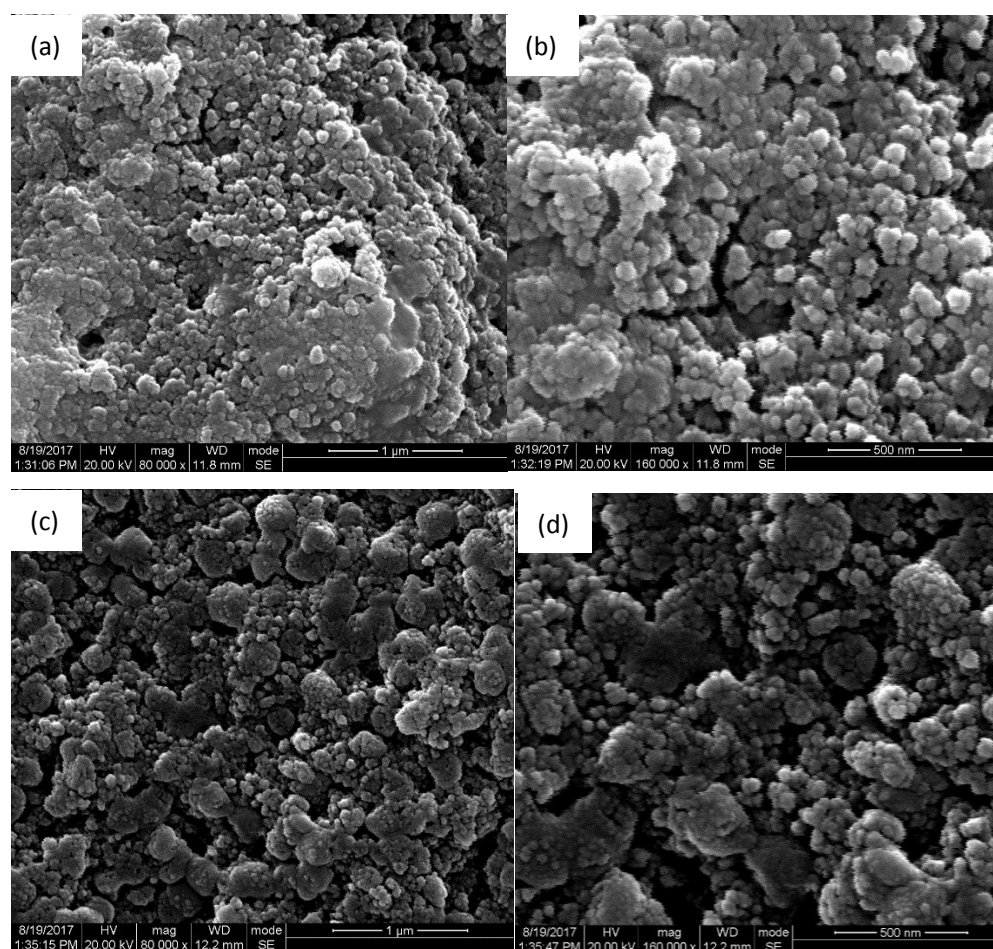

Fig. S1 SEM images of (a) (b) LFP/SCC after 100 cycles at 0.2C and (c) (d) LFP/HCC after 51 cycles at 0.2C.
